# Supplementary material for: Morphology and structure controlled synthesis of ruthenium nanoparticles in oleylamine
Source: Royal Society of Chemistry journal article supplement (doi:10.1039/c3dt51294k), 2013-01-01
Supplement: c3dt51294k.pdf [file c3dt51294k.pdf]

## Electronic Supplementary Information

### Morphology and structure controlled synthesis of ruthenium nanoparticles in oleylamine

Feng Ye,<sup>a</sup> Hui Liu,<sup>ab</sup> Jinhua Yang,<sup>c</sup> Hongbin Cao<sup>d\*</sup> and Jun Yang<sup>a\*</sup>

<sup>a</sup>State Key Laboratory of Multiphase Complex Systems, Institute of Process Engineering, Chinese Academy of Sciences, Beijing, China 100190. Fax: 86-10-8254 4814; Tel: 86-10-8254 4915; E-mail: [jyang@mail.ipe.ac.cn](mailto:jyang@mail.ipe.ac.cn)

<sup>b</sup>University of Chinese Academy of Sciences, No. 19A Yuquan Road, Beijing, China 100049

<sup>c</sup>Institute of Bioengineering and Nanotechnology, 31 Biopolis Way, The Nanos, Singapore 138669

<sup>d</sup>Research Centre for Process Pollution Control, Institute of Process Engineering, Chinese Academy of Sciences, Beijing, China 100190. Fax: 86-10-82544845; Tel: 86-10-82544845; Email: [hbcao@home.ipe.ac.cn](mailto:hbcao@home.ipe.ac.cn)

Financial support from the 100 Talents Program of the Chinese Academy of Sciences, National Natural Science Foundation of China (No.: 21173226, 21106151), and State Key Laboratory of Multiphase Complex Systems, Institute of Process Engineering, Chinese Academy of Sciences (MPCS-2012-A-11, MPCS-2011-D-08, MPCS-2010-C-02) is gratefully acknowledged.

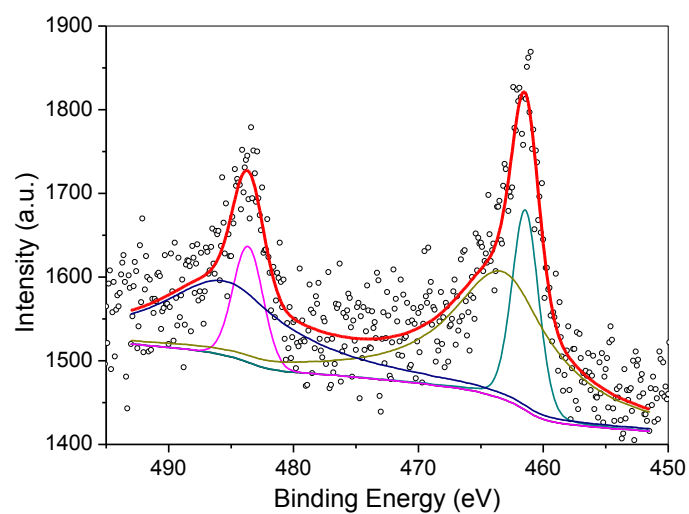

**Fig. S1** 3p XPS spectrum of Ru nanoparticles synthesized directly in oleylamine at 320°C.

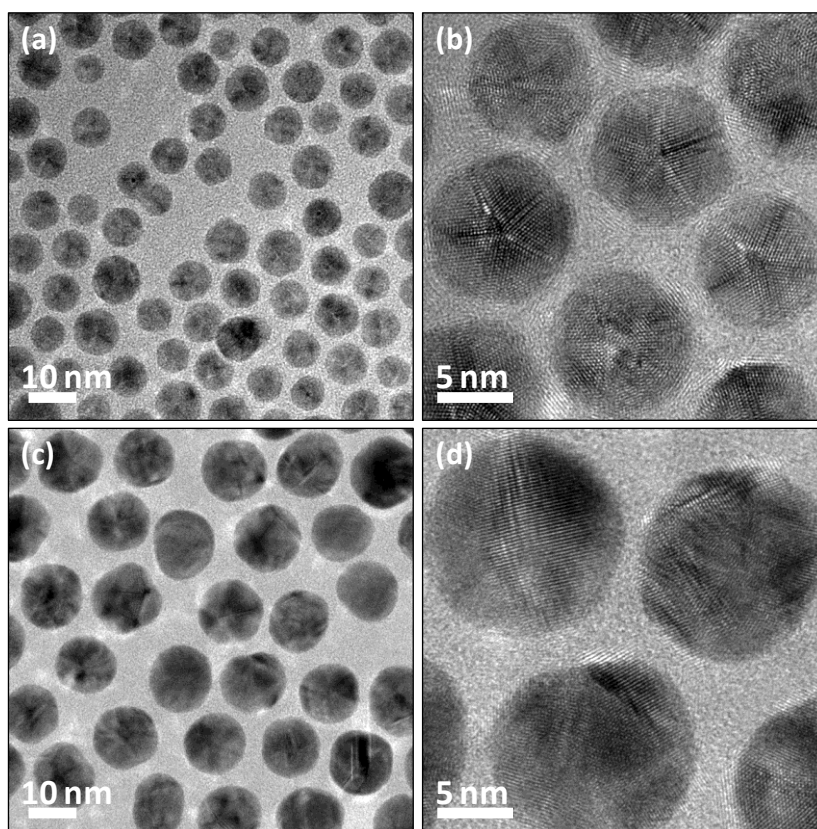

**Fig. S2** TEM (a,c) and HRTEM images (b,d) of Ag (a,b) and Au (c,d) seed particles synthesized in oleylamine at elevated temperature..

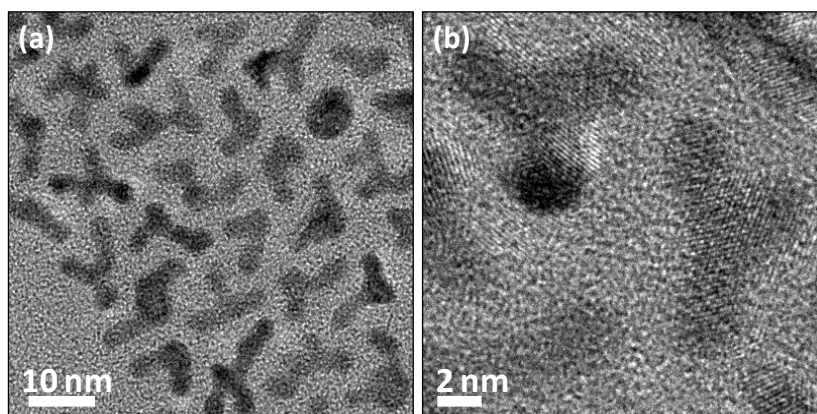

**Fig. S3** TEM (a) and HRTEM image (b) of bimetallic PtRu nanoparticles prepared in oleylamine in the absence of Au seed particles.

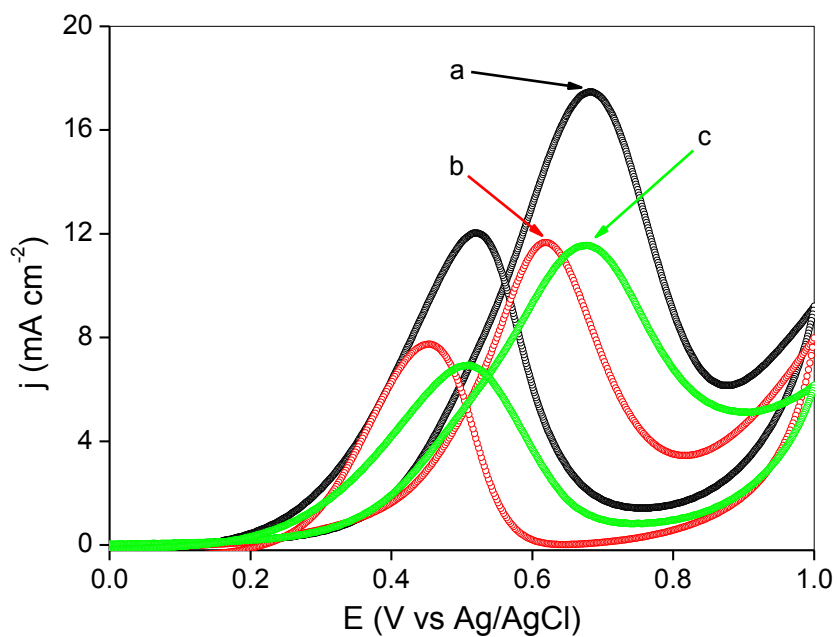

**Fig. S4** Cyclic voltammograms of Au-PtRu nanodendrites (a), physical mixture of PtRu multipods and Au nanoparticles (b), and PtRu multipods (c) as-prepared in oleylamine in argon-purged HClO<sub>4</sub> (0.1 M) with methanol (1 M).
